1 **Outbreak analysis with a logistic growth model shows COVID-19 suppression dynamics**  
2 **in China**

3

4 Yi Zou<sup>1</sup>, Stephen Pan<sup>1</sup>, Peng Zhao<sup>1</sup>, Lei Han<sup>1</sup>, Xiaoxiang Wang<sup>2</sup>, Lia Hemerik<sup>3</sup>, Johannes  
5 Knops<sup>1</sup>, Wopke van der Werf<sup>4</sup>

6

7 <sup>1</sup> Department of Health and Environmental Sciences, Xi'an Jiaotong-Liverpool University,  
8 215123, Suzhou, China

9 <sup>2</sup> School of the Environmental Science and Engineering, Southern University of Science and  
10 Technology, 518055, Shenzhen, China

11 <sup>3</sup> Wageningen University, Biometris, P.O. Box 16, 6700 AA Wageningen, The Netherlands

12 <sup>4</sup> Wageningen University, Centre for Crop Systems Analysis, P.O. Box 430, 6700 AK  
13 Wageningen, The Netherlands

14

15 Corresponding author:

16 Wopke van der Werf

17 Email: [wopke.vanderwerf@wur.nl](mailto:wopke.vanderwerf@wur.nl)

18 Telephone: 00 31 317 484765

19

20 **Abstract**

21 China reported a major outbreak of a novel coronavirus, SARS-CoV2, from mid-January till  
22 mid-March 2020. The number of cases outside China is now growing fast, while in mainland  
23 China the virus outbreak is largely under control. We review the epidemic virus growth and  
24 decline curves in China using a phenomenological logistic growth model to summarize the  
25 outbreak dynamics using three parameters that characterize the epidemic's timing, rate and  
26 peak. During the initial phase, the number of virus cases doubled every 2.7 (range 2.2 - 4.4)  
27 days. The rate of increase in the number of reported cases peaked approximately 10 days after  
28 suppression measures were started on 23-25 January 2020. The peak in the number of  
29 reported sick cases occurred on average 18 days after the start of measures. From the time of  
30 starting measures till the peak, the number of cases increased by a factor 39 in the province  
31 Hubei, and by a factor 9.5 for all of China (range: 6.2-20.4 in the other provinces). Complete  
32 suppression took up to 2 months (range: 23-57d.), during which period severe restrictions,  
33 social distancing measures, testing and isolation of cases were in place. The suppression of  
34 the disease in China has been successful, demonstrating that suppression is a viable strategy to  
35 contain SARS-CoV2.

36

37 Funding: NA.

## 38 **Introduction**

39 The coronavirus SARS-CoV2 emerged in Wuhan, Hubei province, China, in late 2019. From  
40 there it spread, first in Hubei, then across China during the spring holiday, and finally across  
41 the world. Currently (as of 8 April 2020), the virus has been reported from 212 countries areas  
42 or territories and the cumulative number of cases outside China has exceeded 1.2 million[1].  
43 In mainland China, few new cases have been reported since 18 March, and most new cases  
44 have originated from outside China[2]. Thus, the SARS-CoV-2 outbreak in China appears to  
45 be, for now, under control.

46  
47 Virtually the entire global population is susceptible to SARS-CoV2 infection and no vaccine  
48 is available yet. Unless a successful NPI (Non-Pharmaceutical Intervention) strategy is  
49 implemented in the early stages of transmission, an exponential global proliferation threatens  
50 to overwhelm the health care systems of many countries. Three NPI strategies are being  
51 discussed for managing the current COVID-19 epidemic: (1) suppression, (2) mitigation, and  
52 (3) containment[3]. In **suppression**, strict measures are taken to reverse the epidemic spread,  
53 essentially by bringing the effective reproduction number  $R_e$  (the number of new cases per  
54 existing case) below one[4, 5]. Social distancing is a key factor in suppression[6]. In  
55 **mitigation** the aim is not to necessarily stop all transmission, but rather to reduce the rate of  
56 transmission and in effect lower the number of infected people at any given time[3, 7]. It has  
57 been suggested that mitigation strategies might prevent inundation of the health care system  
58 by “flattening” the peak of sick people”[3]. However, even in the most optimistic scenarios  
59 for mitigation, healthcare capacity is likely to be still seriously overwhelmed, as it was in  
60 Wuhan in February 2020 and in Italy in March 2020. Herd immunity has been suggested as a  
61 component of mitigation, but is only a viable option once a vaccine is available because up to  
62 20% of people with confirmed infection develops serious symptoms and needs hospitalization

63 or intensive care [8]. The proportion of unreported cases is uncertain (86% before measures  
64 but 16-21% after measures in the whole of China according to Li, Pei (9); 59% or more in  
65 Wuhan according to Wang, Liu (10)). If underreporting is accounted for, the proportion of  
66 infected people requiring hospitalization is still in the order of 3% or more. Containment is  
67 based on intensive surveillance of possible cases, testing, followed by isolation of infected  
68 people and their contacts[11]. Containment is only possible if the virus is not freely  
69 circulating in a population. Currently, because in many countries outside of China the virus is  
70 circulating within the population, these countries are practicing suppression. Policy makers  
71 may ask:

72

73 (1) How long will it take for the epidemic to peak after suppression measures have been  
74 implemented?

75 (2) What will the peak number of sickness cases be?

76 (3) How long do suppression measures need to be maintained to suppress the virus to  
77 sufficiently low incidence to allow containment (search and quarantine flare-ups of the  
78 virus)?

79

80 Here we analyze with a phenomenological logistic model the epidemics of SARS-CoV2 in  
81 China and 20 of its provinces that reported more than 150 cases. The logistic model is widely  
82 used in ecology to analyze boom and bust population dynamics[12]. Logistic models are not  
83 as widely used in human disease epidemiology as more mechanistic compartment-based SIR  
84 and SEIR models[13-16] because the parameters lack a strict mechanistic interpretation in  
85 terms of transmission rate and disease etiology (e.g. latency period, incubation period and  
86 infectious period). However, this disadvantage is compensated by the usefulness of the  
87 parameters for providing a simple and intuitive description of the outbreak dynamics in time.

88 We do not imply that logistic models can replace established epidemiological models, but we  
89 do argue that phenomenological models, given the urgency and severe consequences of the  
90 worldwide SARS-CoV2 outbreak for public health management, have a place along  
91 mechanistic models to inform on disease dynamics[17] and support narratives on outbreak  
92 dynamics with simple metrics like relative rate of increase, doubling time, and time to the  
93 peak. Using data from China, logistic models shows the key disease dynamic parameters  
94 before and after suppression policies were implemented[18].

95

## 96 **Methods**

97 All data were extracted from official reports from the National Health Commission of  
98 China[19]. We obtained time series data of total confirmed, total recovered, and total death  
99 cases for each provinces of China. We used the data starting on 21 January when reporting  
100 daily infected cases started at the national level, and up to 10 March 2020 when almost no  
101 new confirmed case in China[19]. We did not use data after 10 March to minimize the  
102 influence of cases introduced from outside China.

103

104 We used three-parameter logistic models to fit the time series of the total confirmed and of the  
105 total recovered cases. Parameters refer to the asymptotic value ( $a$ ; number of cases),  
106 the inflection point of the curve ( $b$ ; date) and a scale parameter ( $c$ ; days).

107

$$T_t = \frac{a}{1 + \exp\left(\frac{b-t}{c}\right)}$$

108

109

$$C_t = \frac{a_2}{1 + \exp\left(\frac{b_2-t}{c_2}\right)}$$

110 where  $T_t$  and  $C_t$  are total infected and recovered cases at day  $t$ .

111

112 In addition, we assume a constant daily death rate  $k$ , which was calculated as the average of  
113 number of deceased each day, divided by the infected cases on that day:

114 
$$k = \frac{1}{n} \sum_{i=1}^n \frac{D_i}{I_i}$$

115 Where  $D_t$  and  $I_t$  are the number of daily death cases and active infected cases at day  $t$ . We  
116 excluded data before 25 January and data where  $I_t < 50$  in this calculation, as values are  
117 poorly estimated at an early stage of the outbreak (under-estimated denominator) and at low  $I_t$   
118 (high variability in the outcome).

119

120 We then calculated the active infected cases, which can be expressed as

121 
$$I_t = T_t - TD_t - C_t$$

122 Of which  $TD_t$  is the number of total death at day  $t$ , which equals

123 
$$TD_t = \sum_{i=1}^t k I_i$$

124 And therefore (see Appendix 1 for inference)

125 
$$I_t = \frac{(T_t - T_{t-1}) - (C_t - C_{t-1}) + I_{t-1}}{1 + k}$$

126 where  $T_t - T_{t-1}$  is the daily change in the number of infected cases, and  $C_t - C_{t-1}$  is the daily  
127 change in the number of recovered cases.

128

129 Based on the fitted model, we then calculated the peak date of 1) active sick people, which is  
130 also the date of peak number of daily death, 2) number of sick cases during the peak, 3) the  
131 date of maximum increase in the number of infected cases and 4) the daily rate of increase on  
132 this date, 5) total infected cases on this date, 6) the relative rate on this date, 7) the end date of  
133 daily increase ( $<1$ ) case (operationally the end of the epidemic), and 8) time from maximum  
134 increase till sick peak. Taking the date of level 1 public health emergency action as the

135 implementation of suppression measures[20], which varied between 23 January to 25 January  
136 across provinces[21] (we set the median date, 24 January as the date for entire China), we  
137 then calculated 9) the delay from the action date until the sick peak, 10) the delay from the  
138 action date until the date at which the rate of increase peaked, 11) the time from suppression  
139 measure till the end date of daily increase in number of reported infections, 12) the ratio  
140 between sick cases at peak and total infected case at the action date, as well as 13) the same  
141 ratio considering a reporting delay of 6 days[9], i.e. by taking the ratio of  
142  $sick(t_{peak})/sick(t_{action}+6)$ .

143  
144 Calculations were made for 20 Chinese provinces with more than 150 reported cases, and also  
145 for China excluding Hubei, by far the worst affected province. The built-in function “SSlogis”  
146 in R[22] was used to fit logistic growth curves. Data were obtained using package  
147 “nCov2019” [23, 24].

148

## 149 **Results**

150 The cumulative number of cases (confirmed by testing or based on clinical symptoms) was  
151 described very well by a logistic growth pattern with  $R^2$  greater than 0.99 for all provinces,  
152 except Shandong ( $R^2 > 0.98$ , Table A1). Three provinces enacted suppression measures on 23  
153 January, five implemented measures on 24 January, and the remaining 12 provinces started  
154 measures on 25 January. The time scale for the increase was  $c = 3.91$  d. for China  
155 (excluding Hubei, range 3.13 - 6.39) and 4.13 d. for Hubei (Table A1), indicating doubling  
156 times of  $c * \ln(2) = 2.7$  d. (range 2.2 – 4.4 d) and 2.9 d. for China (excluding Hubei) and for  
157 Hubei, respectively, during the early epidemic. Some lack of fit during the early phase of the  
158 epidemic (before measures) suggests the actual doubling times may be even shorter than these  
159 estimates (Table A1).

160

161 The number of reported active sick cases (total infected minus recovered minus deceased) in  
162 Hubei peaked 25 days after suppression measures were implemented, which in the model also  
163 indicates the peak of number of deaths on the same day. Outside Hubei, the peak number of  
164 reported sick cases (and peak of daily number dying) was on average reached 18 days after  
165 the start of suppression (Table 1). The rate of daily increase in reported cases peaked 17 days  
166 after the start of suppression measures in Hubei, and on average 10 days after the start of  
167 measures in the other provinces (range: 8 to 15 days). When assuming a reporting delay of 6  
168 days[9], the actual peak in the rate of increase occurred at 11 days after the implementation of  
169 measures in Hubei and at 4 days after the implementation of measures in the other provinces.  
170 The actual peak in the number of sick cases peaked at 19 days after the start of measures in  
171 Hubei and at 12 days after the start of measures in the other provinces.

172

173 The relative rate of increase in the number of cases at the time of the peak rate was rather  
174 consistent among provinces, with an average of 0.11 cases/case/day for Hubei and 0.12  
175 cases/case/day for the rest of China (range: 0.08 to 0.15). Between suppression  
176 implementation and the peak number of reported cases, the number of active cases in Hubei  
177 increased by a factor 39, while in other provinces it increased by a factor of 9.5 with  
178 considerable variation between provinces (range: 6.2 in Hainan and Chongqing to 20.4 in  
179 Heilongjiang). If a 6-day reporting delay is accounted for in the estimate of the factor increase  
180 from the start of measures to the peak, then this multiplication factor is diminished to a value  
181 of 9.5 for Hubei and an average of 2.6 for the other provinces. The daily death rate of the  
182 active sick people was 0.34 percent per day for Hubei, much higher than in other provinces  
183 (on average 0.05 percent per day, ranging between 0 in Jiangsu Province (see also Sun, Qiu  
184 (25)) and 0.18 percent per day in Hainan Province, Appendix 3), which indicates that on the



185 day of peak sick in Hubei (about 50,000 reported cases), 170 individuals died. Cumulative to  
186 10 March, the modelled logistic curve showed that for China (excluding Hubei) 0.85% of the  
187 reported cases died which is close to the actual value of 0.86%. The death rate was  
188 overestimated in Hubei as 6.7%, compared to the actual 4.5%, due to the actual daily death  
189 rate declining during the later stages of the epidemic.

190

191 Modelled logistic curves show that the total number of infected cases had plateaued by 21  
192 March for Hubei and by 6 March for the rest of mainland China, i.e. 57 and 42 days (range:  
193 23 to 46 days) after the start of suppression measures (Fig. 1, Table 1).

194

## 195 **Discussion**

196 Our results show compelling evidence for suppression of SARS-CoV-2 transmission in  
197 China, both in Hubei and the other provinces. No new cases were reported within mainland  
198 China on 18, 19 and 20 March, 2020, with all new cases on those days from returning  
199 overseas travelers, signaling the beginning of the end of the outbreak. However isolated cases  
200 still occur, e.g. there was one new case on 24 March in Hubei. Thus, successful suppression  
201 need to be followed by measures that will prevent a new outbreak[11].

202

203 Here we used logistic models to study the disease dynamic parameters. The analysis shown in  
204 our results was continually updated from 1 February to 3 March while the epidemic was  
205 progressing[26]. Based on the data up till 16 February 2020, a peak in sick incidence was  
206 identified for 12 February, which was proven correct[27]. Thus, logistic models may be used  
207 to determine early when suppression measures are expected to result in decreased rate of  
208 epidemic growth and a decline in number of sick cases. However, any model shows lack of  
209 fit[18]. The logistic model did not capture that the rate of increase in the early epidemic is

210 faster than the rate of decline during the tapering out of the epidemic (Appendix A1). Thus,  
211 the logistic underestimates both the early relative growth rate and the increase of the number  
212 of sick people from the start of measures till the peak for the Chinese data (Appendix A1).  
213 Uncertainties in predictions also result from unknown reporting delay[9]. Improvements may  
214 be possible by defining better tailored models, and especially, by collecting better data, e.g.  
215 more (random) testing.

216

217 The results show that suppression can lead to (almost) complete removal of active virus  
218 infected cases from the population, although given that not all active cases have recovered,  
219 the outbreak is not completely over. The virus could still be present in asymptomatic  
220 individuals or it could be re-introduced from unknown reservoirs. Re-entry of the virus from  
221 countries outside China now needs to be prevented. Because the vast majority of the  
222 population is not immune to SARS-CoV2, the virus can rapidly re-establish. Therefore,  
223 suppression needs to be followed up by containment, a strategy based on strict surveillance,  
224 testing of all individuals with symptoms, and followed by isolation of all infected individuals  
225 and their recent contacts[11]. Currently, quarantine restrictions are gradually being lifted in  
226 China, including Hubei Province, after no new cases have been detected for several weeks,  
227 allowing people to return to work and businesses to start up again. Moreover, in China,  
228 schools are preparing to reopen in April and normal social activities are slowly resuming[28].  
229 These findings indicate that the implemented measures have been effective for controlling  
230 SARS-CoV2 transmission in China[21, 29-31].

231

232 Many individuals infected with SARS-CoV2 show minimal or no symptoms. Due in part to  
233 asymptomatic carriers, many infected individuals remain untested and unreported. Before 31  
234 March, asymptomatic cases were not included in in the outbreak's daily report in China [32].

235 It is estimated that unreported cases were responsible for 77% of the reproduction number of  
236 the disease before the start of measures in China and 16-21% thereafter[9, 10]. Moreover,  
237 about half of infected individuals that develop symptoms do not show symptoms until 5 days  
238 after infection, and some not up to 14 days, and maybe even up to 30 days[10, 33]. Cases with  
239 a long incubation period, if they exist, could contribute to re-emergence of COVID-19 after  
240 restrictions are lifted. Nonetheless, as the experience in China and several other  
241 countries/regions (e.g. South Korea, Taiwan, Hongkong, Japan and Singapore) has shown, a  
242 containment strategy can prevent the virus from uncontrolled spread if it re-emerges. Given  
243 the worldwide pandemic spread of SARS-CoV2, it seems increasingly unavoidable that  
244 worldwide containment will depend on a vaccine. Until a vaccine is ready and accessible, the  
245 world population must confront the pandemic by combining suppression and containment in a  
246 practical way that minimizes the human and economic costs. As noted by Wu and McGoogan  
247 (8), “It is not only individual rights that need to be considered. The rights of those who are not  
248 infected, but at risk of infection, must be considered as well.”

249

250 Important lessons from the outbreak and its control in China are in our opinion:

- 251 1. Suppression of SARS-CoV-2 is possible even after widespread community transmission.
- 252 2. Suppression can be achieved in one to two months if stringent measures are implemented  
253 and maintained.
- 254 3. If implementation of stringent suppression measures is delayed, as was the case in Hubei,  
255 the peak outbreak time is later, the increase in the number of sick people is greater, the  
256 mortality rate is higher, and the necessary period of suppression is longer.
- 257 4. China provides compelling evidence that suppression of SARS-CoV-2 transmission can be  
258 achieved within 60 days, even following widespread community transmission. It is the  
259 opinion of the authors that addressing the widespread SARS-CoV-2 transmission in other

260 countries with unproven mitigation strategies may subject a large part of their populations  
261 unnecessarily to the adverse health risks associated with COVID-19[7, 34].

262

### 263 **Contributors**

264 YZ and WW conceived the study. YZ performed the analysis. YZ, SP, JK and WW wrote the  
265 manuscript with significant contributions from all authors. All authors approved the final  
266 version for submission.

267

### 268 **Declaration of interests**

269 We declare no competing interests.

270

### 271 **Data sharing**

272 Data used in this study are publicly accessible.

273

### 274 **Acknowledgements**

275 We thank Jiajun Liu, Elmer Villanueva, Kevin Schneider, David Kottelenberg, Wytse van der  
276 Werf, Bouke van der Werf, Marco Pautasso, and Hans Heesterbeek for comments and  
277 suggestions.

278

## References

1. WHO. Coronavirus disease 2019 (COVID-19) situation report-78, 7 April 2020 2020 [cited 2020 08 April]. Available from: [https://www.who.int/docs/default-source/coronaviruse/situation-reports/20200407-sitrep-78-covid-19.pdf?sfvrsn=bc43e1b\\_2](https://www.who.int/docs/default-source/coronaviruse/situation-reports/20200407-sitrep-78-covid-19.pdf?sfvrsn=bc43e1b_2).
2. WHO. Coronavirus disease 2019 (COVID-19) situation report-58, 18 March 2020 2020 [cited 2020 08 April]. Available from: [https://www.who.int/docs/default-source/coronaviruse/situation-reports/20200318-sitrep-58-covid-19.pdf?sfvrsn=20876712\\_2](https://www.who.int/docs/default-source/coronaviruse/situation-reports/20200318-sitrep-58-covid-19.pdf?sfvrsn=20876712_2).
3. Ferguson NM, Laydon D, Nedjati-Gilani G, Imai N, Ainslie K, Baguelin M, et al. Impact of non-pharmaceutical interventions (NPIs) to reduce COVID-19 mortality and healthcare demand. Imperial College COVID-19 Response Team. 2020.
4. Hellewell J, Abbott S, Gimma A, Bosse NI, Jarvis CI, Russell TW, et al. Feasibility of controlling COVID-19 outbreaks by isolation of cases and contacts. *The Lancet Global Health*. 2020;8(4):e488-e96. doi: [https://doi.org/10.1016/S2214-109X\(20\)30074-7](https://doi.org/10.1016/S2214-109X(20)30074-7).
5. Lai S, Ruktanonchai NW, Zhou L, Prosper O, Luo W, Floyd JR, et al. Effect of non-pharmaceutical interventions for containing the COVID-19 outbreak in China. medRxiv. 2020:2020.03.03.20029843. doi: 10.1101/2020.03.03.20029843.
6. Pueyo T. Coronavirus: why you must act now 2020 [cited 2020 03 April]. Available from: <https://medium.com/@tomaspueyo/coronavirus-act-today-or-people-will-die-f4d3d9cd99ca>.
7. Anderson RM, Heesterbeek H, Klinkenberg D, Hollingsworth TD. How will country-based mitigation measures influence the course of the COVID-19 epidemic? *The Lancet*. 2020. doi: 10.1016/S0140-6736(20)30567-5.
8. Wu Z, McGoogan JM. Characteristics of and Important Lessons From the Coronavirus Disease 2019 (COVID-19) Outbreak in China: Summary of a Report of 72 314 Cases From the Chinese Center for Disease Control and Prevention. *JAMA*. 2020. doi: 10.1001/jama.2020.2648.
9. Li R, Pei S, Chen B, Song Y, Zhang T, Yang W, et al. Substantial undocumented infection facilitates the rapid dissemination of novel coronavirus (SARS-CoV2). *Science*. 2020:eabb3221. doi: 10.1126/science.abb3221.
10. Wang C, Liu L, Hao X, Guo H, Wang Q, Huang J, et al. Evolving Epidemiology and Impact of Non-pharmaceutical Interventions on the Outbreak of Coronavirus Disease 2019 in Wuhan, China. medRxiv. 2020:2020.03.03.20030593. doi: 10.1101/2020.03.03.20030593.
11. Pueyo T. The hammer and the dance. What the next 18 months can look like, if leaders buy us time 2020 [cited 2020 03 April]. Available from: <https://medium.com/@tomaspueyo/coronavirus-the-hammer-and-the-dance-be9337092b56>.
12. Kot M. *Elements of mathematical ecology*. Cambridge, UK: Cambridge University Press; 2001.
13. Edelstein-Keshet L. *Mathematical Models in Biology*. Society for Industrial and Applied Mathematics. Canada: British Columbia; 2005.
14. Murray JD. *Mathematical biology: I. An introduction*. 3rd edition. New York, USA: Springer Science & Business Media; 2007.
15. Wu JT, Leung K, Leung GM. Nowcasting and forecasting the potential domestic and international spread of the 2019-nCoV outbreak originating in Wuhan, China: a modelling study. *The Lancet*. 2020;395(10225):689-97. doi: 10.1016/S0140-6736(20)30260-9.
16. Prem K, Liu Y, Russell TW, Kucharski AJ, Eggo RM, Davies N, et al. The effect of control strategies to reduce social mixing on outcomes of the COVID-19 epidemic in Wuhan, China: a modelling study. *The Lancet Public Health*. 2020. doi: [https://doi.org/10.1016/S2468-2667\(20\)30073-6](https://doi.org/10.1016/S2468-2667(20)30073-6).

17. Batista M. Estimation of the final size of the second phase of the coronavirus epidemic by the logistic model. medRxiv. 2020:2020.03.11.20024901. doi: 10.1101/2020.03.11.20024901.
18. Wu K, Darcet D, Wang Q, Sornette D. Generalized logistic growth modeling of the COVID-19 outbreak in 29 provinces in China and in the rest of the world. arXiv. 2020.
19. National Health Commission of the People's Republic of China. 2020 [cited 2020 08 April]. Available from: <http://www.nhc.gov.cn>.
20. The State Council of the PRC. Contingency Plan of National Public Health Emergency 2006 [cited 2020 03 April]. Available from: [http://www.gov.cn/yjgl/2006-02/26/content\\_211654.htm](http://www.gov.cn/yjgl/2006-02/26/content_211654.htm).
21. Tian H, Liu Y, Li Y, Wu C-H, Chen B, Kraemer MUG, et al. An investigation of transmission control measures during the first 50 days of the COVID-19 epidemic in China. Science. 2020:eabb6105. doi: 10.1126/science.abb6105.
22. R Core Team. R: A language and environment for statistical computing. Version 3.6.3. Vienna, Austria.: R Foundation for Statistical Computing; 2020.
23. Yu G. nCov2019: Stats of the '2019-nCov' Cases. R package version 0.3.3. 2020.
24. Wu T, Ge X, Yu G, Hu E. Open-source analytics tools for studying the COVID-19 coronavirus outbreak. medRxiv. 2020:2020.02.25.20027433. doi: 10.1101/2020.02.25.20027433.
25. Sun Q, Qiu H, Huang M, Yang Y. Lower mortality of COVID-19 by early recognition and intervention: experience from Jiangsu Province. Annals of Intensive Care. 2020;10(1):33. doi: 10.1186/s13613-020-00650-2.
26. Zhao P, Zou Y, Han L, Wang X. Website for information of 2019-nCoV outbreak 2020 [cited 2020 08 April]. Available from: <https://ncov2020.org/en/>.
27. XJTLU. Model indicates current COVID-19 infections in China already declining 2020 [cited 2020 08 April]. Available from: <https://www.xjtlu.edu.cn/en/news/2020/02/model-indicates-current-covid-19-infections-in-china-already-declining>.
28. Jiangsu Education Department. The notice on further refining the work plan for the start of the spring semester in 2020 2020 [cited 2020 08 April]. Available from: [http://jyt.jiangsu.gov.cn/art/2020/3/23/art\\_58320\\_9019848.html](http://jyt.jiangsu.gov.cn/art/2020/3/23/art_58320_9019848.html).
29. Kupferschmidt K, Cohen J. Can China's COVID-19 strategy work elsewhere? Science. 2020;367(6482):1061-2. doi: 10.1126/science.367.6482.1061.
30. Ainslie KEC, Walters C, Fu H, Bhatia S, Wang H, Baguelin M, et al. Evidence of initial success for China exiting COVID-19 social distancing policy after achieving containment. Imperial College COVID-19 Response Team. 2020.
31. Kraemer MUG, Yang C-H, Gutierrez B, Wu C-H, Klein B, Pigott DM, et al. The effect of human mobility and control measures on the COVID-19 epidemic in China. Science. 2020:eabb4218. doi: 10.1126/science.abb4218.
32. National Health Commission of the People's Republic of China. Asymptomatic COVID-19 infections to be in outbreak's daily report 2020 [cited 2020 08 April]. Available from: [http://en.nhc.gov.cn/2020-03/31/c\\_78577.htm](http://en.nhc.gov.cn/2020-03/31/c_78577.htm).
33. Lauer SA, Grantz KH, Bi Q, Jones FK, Zheng Q, Meredith HR, et al. The Incubation Period of Coronavirus Disease 2019 (COVID-19) From Publicly Reported Confirmed Cases: Estimation and Application. Annals of Internal Medicine. 2020. doi: 10.7326/m20-0504.
34. Jia W, Han K, Song Y, Cao W, Wang S, Yang S, et al. Extended SIR prediction of the epidemics trend of COVID-19 in Italy and compared with Hunan, China. medRxiv. 2020:2020.03.18.20038570. doi: 10.1101/2020.03.18.20038570.



1

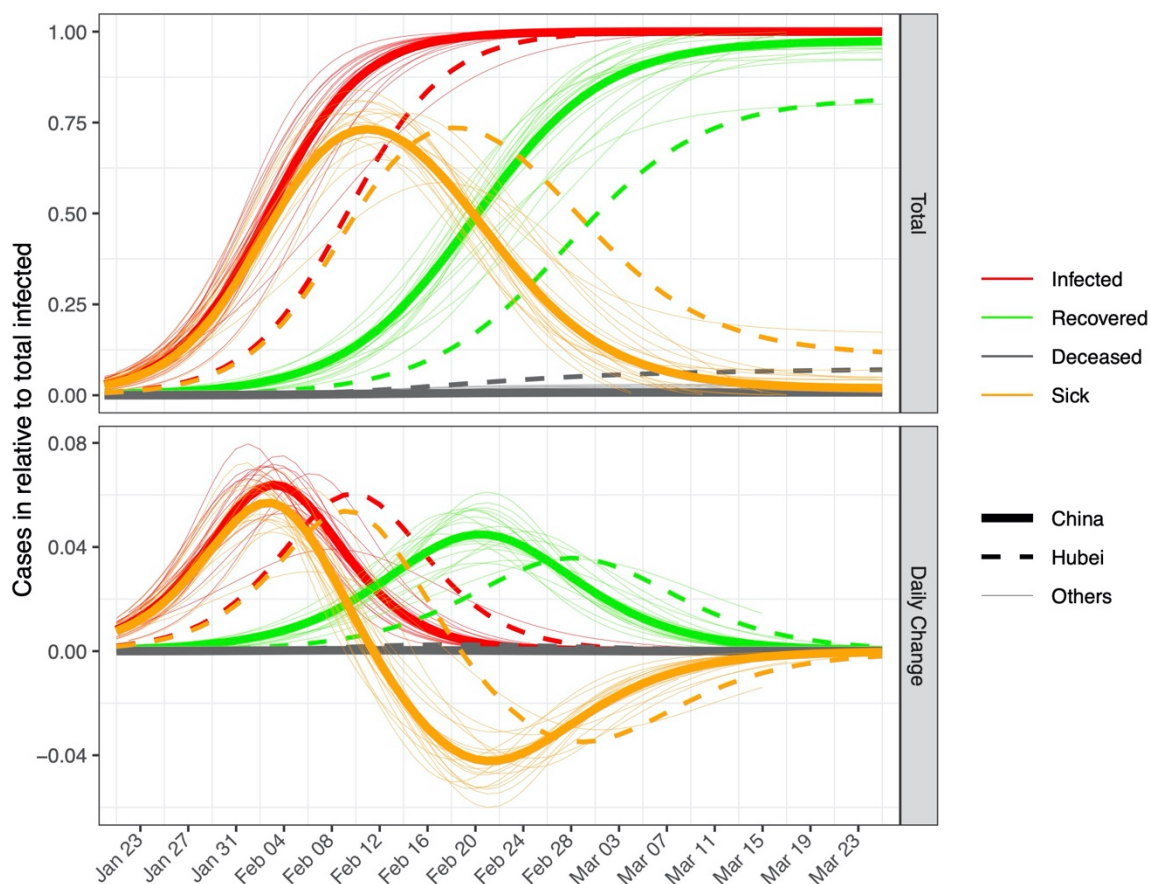

2

3 Fig. 1. Fitted epidemic curves based on the observed data of SARS-CoV2 in China excluding  
4 Hubei (thick solid lines), Hubei (dashed lines), and 19 other provinces (thin solid lines). The  
5 y-axis of the top panel shows the number of cases relative to the maximum cumulative  
6 infected for each region (the value  $a$ , see methods). The bottom panel shows the daily change  
7 on the same relative scale. Red, green and grey colors indicate confirmed, recovered and  
8 deceased cases. Orange color indicates the number of “active” sick cases (relative to total  
9 infected, top panel), i.e. infected and not yet recovered or deceased, and the daily changes  
10 (bottom panel), with negative values in the lower panel indicating that the number of active  
11 cases is decreasing. Fitted and observed values for the true number can be found in Fig. A1  
12 and Fig. A2.

Table 1: Total confirmed infected cases (up to 10<sup>th</sup> March), emergency action start date and characteristics of logistic growth curves of epidemic progress in mainland China (excluding Hubei) and other 20 provinces with at least 150 cases of SARS-CoV2. Ratio refers to the sick cases at peak to the total number of infected cases at action date.

| Region                | Total confirmed infected cases | Emergency action start date | Peak date of active sick cases (or peak daily death) | Daily increase peak date | Daily increase end date | Delay from action until sick peak | Delay from action until maximum rate | Time from action to the outbreak end | Time from maximum rate till sick peak | Max Sick cases | Cases at time of maximum daily increase | Total infected cases at maximum daily increase date | Relative rate At peak increase rate (cases/case/d) | Ratio no reporting delay | Ratio 6 days reporting delay |
|-----------------------|--------------------------------|-----------------------------|------------------------------------------------------|--------------------------|-------------------------|-----------------------------------|--------------------------------------|--------------------------------------|---------------------------------------|----------------|-----------------------------------------|-----------------------------------------------------|----------------------------------------------------|--------------------------|------------------------------|
| China excluding Hubei | 13004                          | 24-Jan                      | 11-Feb                                               | 3-Feb                    | 6-Mar                   | 18                                | 10                                   | 42                                   | 8                                     | 9423           | 823                                     | 6692                                                | 0.12                                               | 9.5                      | 2.6                          |
| Hubei                 | 67773                          | 24-Jan                      | 18-Feb                                               | 10-Feb                   | 21-Mar                  | 25                                | 17                                   | 57                                   | 8                                     | 49719          | 4086                                    | 36796                                               | 0.11                                               | 39                       | 9.6                          |
| Guangdong             | 1353                           | 23-Jan                      | 10-Feb                                               | 3-Feb                    | 24-Feb                  | 18                                | 11                                   | 32                                   | 7                                     | 1009           | 95                                      | 765                                                 | 0.12                                               | 13.7                     | 3.1                          |
| Henan                 | 1272                           | 25-Jan                      | 10-Feb                                               | 3-Feb                    | 24-Feb                  | 16                                | 9                                    | 30                                   | 7                                     | 947            | 91                                      | 659                                                 | 0.14                                               | 10.0                     | 2.4                          |
| Zhejiang              | 1215                           | 23-Jan                      | 9-Feb                                                | 1-Feb                    | 20-Feb                  | 17                                | 9                                    | 28                                   | 8                                     | 926            | 95                                      | 648                                                 | 0.15                                               | 12.4                     | 2.5                          |
| Hunan                 | 1018                           | 23-Jan                      | 9-Feb                                                | 2-Feb                    | 23-Feb                  | 17                                | 10                                   | 31                                   | 7                                     | 718            | 72                                      | 516                                                 | 0.14                                               | 12.7                     | 2.9                          |
| Anhui                 | 990                            | 24-Jan                      | 11-Feb                                               | 4-Feb                    | 24-Feb                  | 18                                | 11                                   | 31                                   | 7                                     | 781            | 70                                      | 542                                                 | 0.13                                               | 15.4                     | 3.5                          |
| Jiangxi               | 935                            | 24-Jan                      | 11-Feb                                               | 4-Feb                    | 23-Feb                  | 18                                | 11                                   | 30                                   | 7                                     | 731            | 70                                      | 529                                                 | 0.13                                               | 17.3                     | 3.5                          |
| Shandong              | 758                            | 24-Jan                      | 17-Feb                                               | 8-Feb                    | 10-Mar                  | 24                                | 15                                   | 46                                   | 9                                     | 451            | 30                                      | 399                                                 | 0.08                                               | 6.3                      | 2.8                          |
| Jiangsu               | 631                            | 25-Jan                      | 11-Feb                                               | 4-Feb                    | 24-Feb                  | 17                                | 10                                   | 30                                   | 7                                     | 451            | 41                                      | 337                                                 | 0.12                                               | 8.9                      | 2.5                          |
| Chongqing             | 576                            | 24-Jan                      | 11-Feb                                               | 2-Feb                    | 24-Feb                  | 18                                | 9                                    | 31                                   | 9                                     | 416            | 33                                      | 291                                                 | 0.11                                               | 6.2                      | 2.1                          |
| Sichuan               | 539                            | 24-Jan                      | 13-Feb                                               | 4-Feb                    | 26-Feb                  | 20                                | 11                                   | 33                                   | 9                                     | 373            | 28                                      | 291                                                 | 0.10                                               | 6.7                      | 2.4                          |
| Heilongjiang          | 482                            | 25-Jan                      | 14-Feb                                               | 6-Feb                    | 25-Feb                  | 20                                | 12                                   | 31                                   | 8                                     | 374            | 33                                      | 247                                                 | 0.13                                               | 20.4                     | 4.6                          |
| Beijing               | 435                            | 24-Jan                      | 11-Feb                                               | 3-Feb                    | 23-Feb                  | 18                                | 10                                   | 30                                   | 8                                     | 299            | 24                                      | 223                                                 | 0.11                                               | 6.8                      | 2.3                          |
| Shanghai              | 344                            | 24-Jan                      | 9-Feb                                                | 2-Feb                    | 19-Feb                  | 16                                | 9                                    | 26                                   | 7                                     | 261            | 23                                      | 190                                                 | 0.12                                               | 7.7                      | 2.1                          |
| Hebei                 | 318                            | 24-Jan                      | 12-Feb                                               | 5-Feb                    | 25-Feb                  | 19                                | 12                                   | 32                                   | 7                                     | 207            | 18                                      | 161                                                 | 0.11                                               | 10.3                     | 3.1                          |
| Fujian                | 296                            | 24-Jan                      | 10-Feb                                               | 1-Feb                    | 18-Feb                  | 17                                | 8                                    | 25                                   | 9                                     | 238            | 21                                      | 149                                                 | 0.14                                               | 8.2                      | 2.2                          |
| Guangxi               | 252                            | 24-Jan                      | 12-Feb                                               | 3-Feb                    | 21-Feb                  | 19                                | 10                                   | 28                                   | 9                                     | 195            | 14                                      | 137                                                 | 0.10                                               | 7.1                      | 2.4                          |
| Shaanxi               | 245                            | 25-Jan                      | 11-Feb                                               | 2-Feb                    | 19-Feb                  | 17                                | 8                                    | 25                                   | 9                                     | 197            | 16                                      | 126                                                 | 0.12                                               | 6.8                      | 2.1                          |
| Yunnan                | 174                            | 24-Jan                      | 10-Feb                                               | 1-Feb                    | 16-Feb                  | 17                                | 8                                    | 23                                   | 9                                     | 145            | 11                                      | 91                                                  | 0.13                                               | 7.1                      | 2.1                          |
| Hainan                | 168                            | 25-Jan                      | 11-Feb                                               | 4-Feb                    | 20-Feb                  | 17                                | 10                                   | 26                                   | 7                                     | 120            | 10                                      | 94                                                  | 0.10                                               | 6.2                      | 2.1                          |



1 **Supplementary information**

2

3 **Appendix 1. Formula inference**

4

5  $I_t = T_t - \sum_{i=1}^t k I_i - C_t$  (1)

6

7  $I_{t-1} = T_{t-1} - \sum_{i=1}^{t-1} k I_i - C_{t-1}$  (2)

8 Equation (1) - Equation (2)

9  $I_t - I_{t-1} = (T_t - T_{t-1}) - (C_t - C_{t-1}) - k I_t$

10  $I_t - I_{t-1} + k I_t = (T_t - T_{t-1}) - (C_t - C_{t-1})$

11  $I_t + k I_t = (T_t - T_{t-1}) - (C_t - C_{t-1}) + I_{t-1}$

12  $I_t (1 + k) = (T_t - T_{t-1}) - (C_t - C_{t-1}) + I_{t-1}$

13 Therefore,

14 
$$I_t = \frac{(T_t - T_{t-1}) - (C_t - C_{t-1}) + I_{t-1}}{1 + k}$$

15

16

Table A1. Estimated model parameters per province and for China (excluding Hubei) and other 20 provinces with at least 150 cases of SARS-CoV2

| Region                  | Daily fatality rate (%) | a           | b          | c           | R-squared | a2          | b2         | c2          | R-squared2 |
|-------------------------|-------------------------|-------------|------------|-------------|-----------|-------------|------------|-------------|------------|
| China (excluding Hubei) | 0.05 ± 0.01             | 12882 ± 42  | 14.7 ± 0.1 | 3.91 ± 0.07 | 0.999     | 12558 ± 83  | 31.9 ± 0.1 | 5.43 ± 0.09 | 0.999      |
| Hubei                   | 0.34 ± 0.05             | 67622 ± 463 | 21.3 ± 0.2 | 4.13 ± 0.13 | 0.996     | 55387 ± 556 | 39.6 ± 0.2 | 5.73 ± 0.08 | 0.999      |
| Guangdong               | 0.05 ± 0.03             | 1344 ± 3    | 14 ± 0.1   | 3.52 ± 0.05 | 0.999     | 1304 ± 24   | 32.4 ± 0.4 | 6.19 ± 0.24 | 0.995      |
| Henan                   | 0.17 ± 0.06             | 1270 ± 4    | 13.7 ± 0.1 | 3.47 ± 0.06 | 0.999     | 1288 ± 8    | 29.8 ± 0.1 | 4.62 ± 0.09 | 0.999      |
| Zhejiang                | 0.00 ± 0.00             | 1196 ± 5    | 12.5 ± 0.1 | 3.13 ± 0.09 | 0.997     | 1245 ± 16   | 31.6 ± 0.3 | 6.30 ± 0.18 | 0.997      |
| Hunan                   | 0.02 ± 0.01             | 1018 ± 3    | 12.9 ± 0.1 | 3.50 ± 0.07 | 0.999     | 972 ± 11    | 27.8 ± 0.2 | 5.30 ± 0.17 | 0.997      |
| Anhui                   | 0.02 ± 0.01             | 993 ± 2     | 15.3 ± 0.1 | 3.54 ± 0.04 | 0.999     | 1003 ± 5    | 32.4 ± 0.1 | 4.43 ± 0.06 | 0.999      |
| Jiangxi                 | 0.00 ± 0.00             | 936 ± 3     | 15.1 ± 0.1 | 3.32 ± 0.06 | 0.999     | 938 ± 5     | 31.6 ± 0.1 | 4.61 ± 0.07 | 0.999      |
| Shandong                | 0.04 ± 0.02             | 774 ± 13    | 19.6 ± 0.5 | 6.39 ± 0.40 | 0.979     | 854 ± 39    | 39.6 ± 0.9 | 7.81 ± 0.37 | 0.993      |
| Jiangsu                 | 0.00 ± 0.00             | 635 ± 2     | 13.5 ± 0.1 | 3.89 ± 0.09 | 0.998     | 616 ± 5     | 28.9 ± 0.1 | 4.89 ± 0.12 | 0.998      |
| Chongqing               | 0.05 ± 0.02             | 575 ± 2     | 12.9 ± 0.1 | 4.40 ± 0.09 | 0.998     | 543 ± 9     | 30.8 ± 0.3 | 5.57 ± 0.22 | 0.995      |
| Sichuan                 | 0.03 ± 0.02             | 536 ± 3     | 15.2 ± 0.2 | 4.72 ± 0.14 | 0.996     | 515 ± 9     | 34.7 ± 0.3 | 6.89 ± 0.19 | 0.997      |
| Beijing                 | 0.11 ± 0.05             | 411 ± 2     | 14.2 ± 0.1 | 4.35 ± 0.12 | 0.996     | 330 ± 3     | 31.9 ± 0.2 | 5.92 ± 0.11 | 0.999      |
| Heilongjiang            | 0.15 ± 0.05             | 482 ± 2     | 16.8 ± 0.1 | 3.66 ± 0.06 | 0.999     | 445 ± 6     | 34.7 ± 0.2 | 5.03 ± 0.15 | 0.997      |
| Shanghai                | 0.04 ± 0.03             | 337 ± 1     | 13 ± 0.1   | 3.67 ± 0.06 | 0.999     | 311 ± 2     | 29.4 ± 0.1 | 4.35 ± 0.11 | 0.998      |
| Hebei                   | 0.11 ± 0.05             | 319 ± 2     | 14.9 ± 0.1 | 4.42 ± 0.12 | 0.997     | 315 ± 2     | 29 ± 0.1   | 4.56 ± 0.07 | 0.999      |
| Fujian                  | 0.02 ± 0.02             | 294 ± 2     | 10.9 ± 0.1 | 3.57 ± 0.12 | 0.995     | 307 ± 3     | 31.4 ± 0.2 | 5.45 ± 0.13 | 0.998      |
| Guangxi                 | 0.03 ± 0.02             | 251 ± 1     | 14.2 ± 0.1 | 4.38 ± 0.10 | 0.998     | 255 ± 3     | 35.7 ± 0.2 | 5.96 ± 0.14 | 0.998      |
| Shaanxi                 | 0.03 ± 0.03             | 244 ± 1     | 11.8 ± 0.1 | 3.89 ± 0.09 | 0.997     | 233 ± 2     | 30.1 ± 0.1 | 4.32 ± 0.11 | 0.998      |
| Yunnan                  | 0.07 ± 0.05             | 172 ± 1     | 12.6 ± 0.2 | 3.77 ± 0.19 | 0.988     | 177 ± 2     | 32.5 ± 0.2 | 4.20 ± 0.13 | 0.997      |
| Hainan                  | 0.18 ± 0.09             | 170 ± 1     | 15 ± 0.1   | 4.41 ± 0.12 | 0.996     | 163 ± 1     | 31.4 ± 0.1 | 4.64 ± 0.11 | 0.998      |

Fig. A1

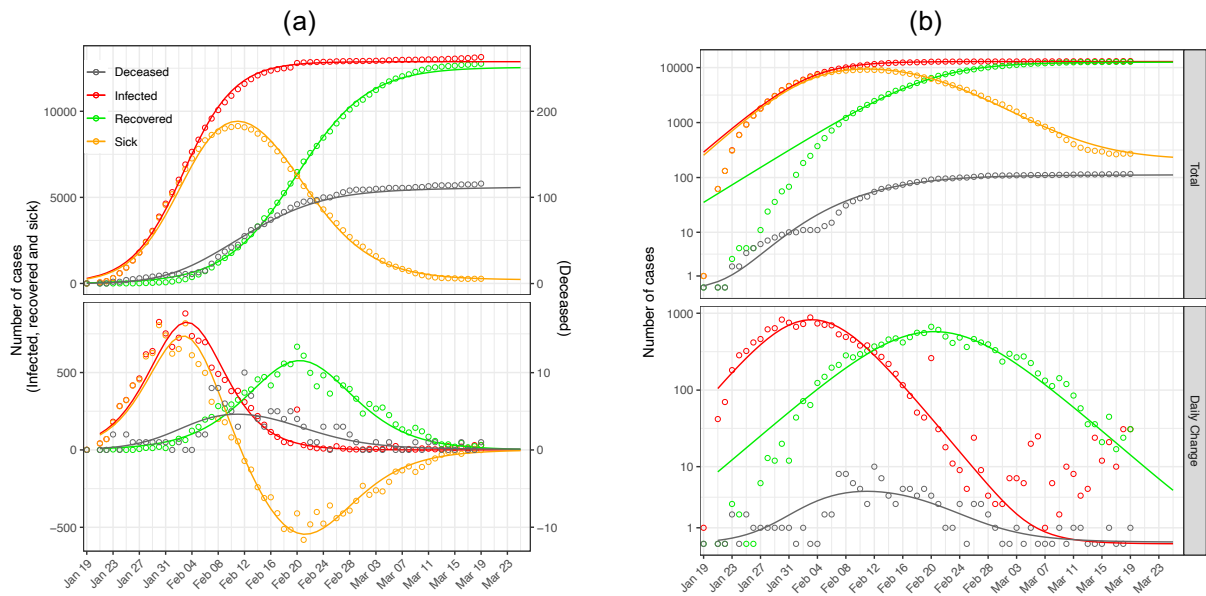

Fig. A1 Observed and fitted epidemics of SARS-CoV2 in mainland China excluding Hubei province for normal- (a) and log-scale (b) y-axis. Dots are observed cases and lines are model fits. Top panel refers total cases and bottom panel refers to daily changes. For the normal scale (A), the left y-axis is for infected, recovered and sick cases and the right y-axis for deceased cases. Red colour indicates the total number of infected cases (confirmed and suspected) (top panel) or the daily rate of increase in the number of cases (bottom panel). Green colour indicate the recovered cases in both panels. Grey colour indicates cumulative deaths in the upper graph and daily death cases in the lower panel. Orange colour indicates the number of “active” cases (top panel), i.e. infected and not yet recovered or deceased, and the daily change in the number of active cases (bottom panel). Negative values (in normal scale) in the lower panel mean that the number of active cases is decreasing.

Fig. A2-a

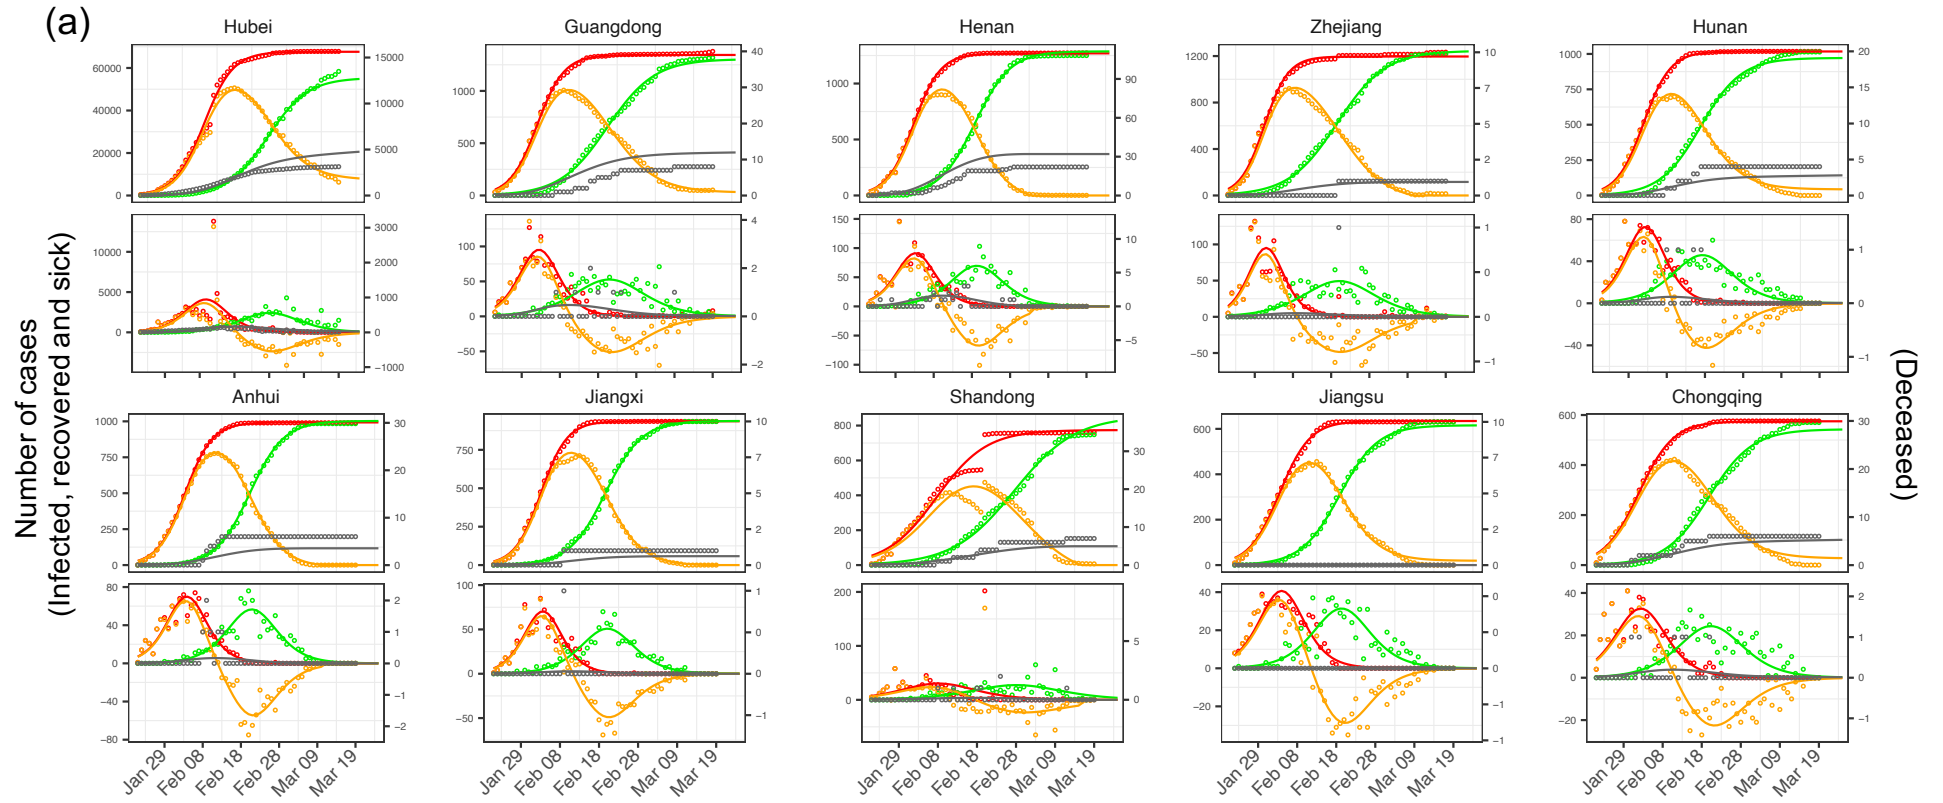

Fig. A2-a (continue)

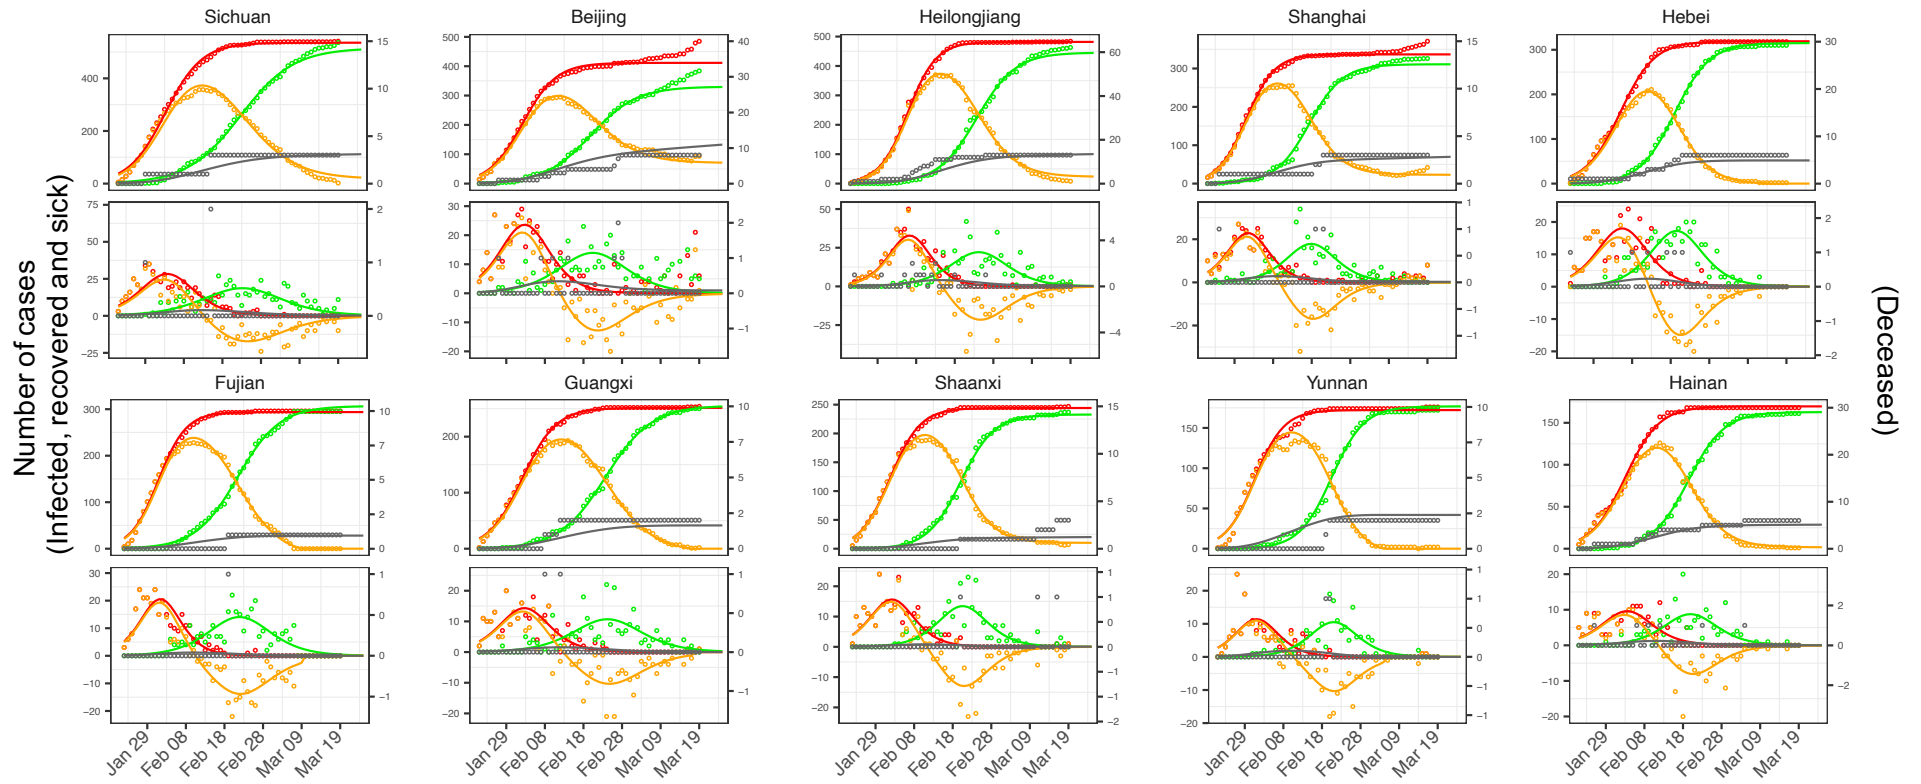

Fig. A2-b

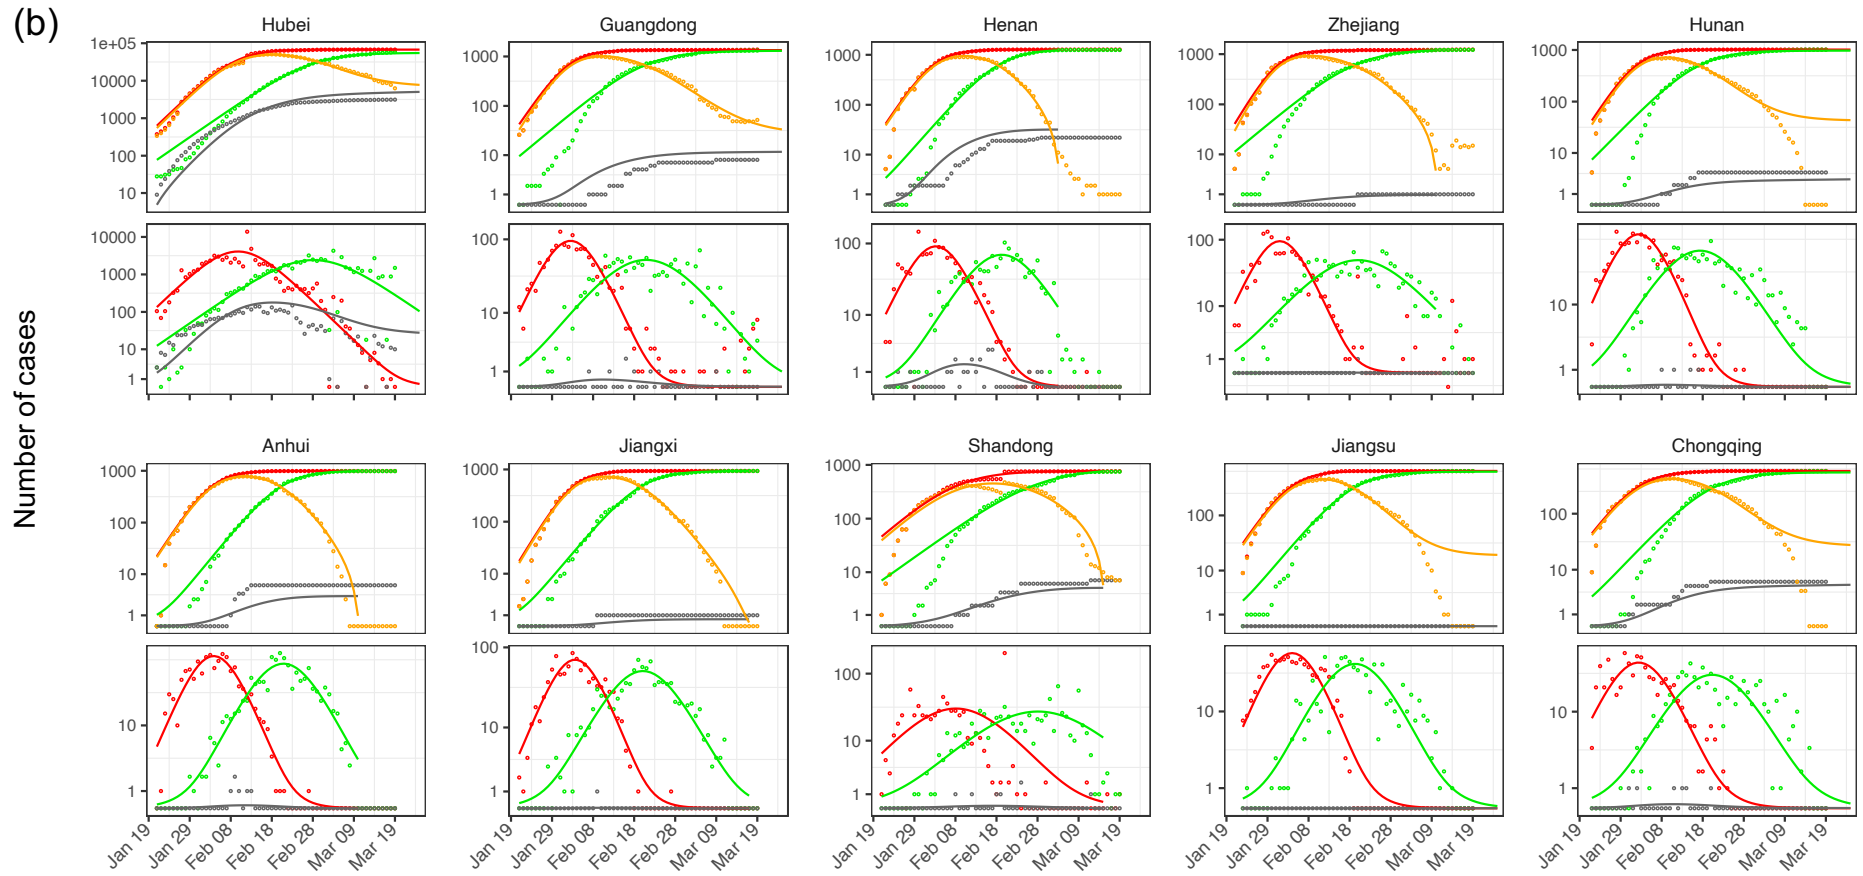

Fig. A2-b (continue)

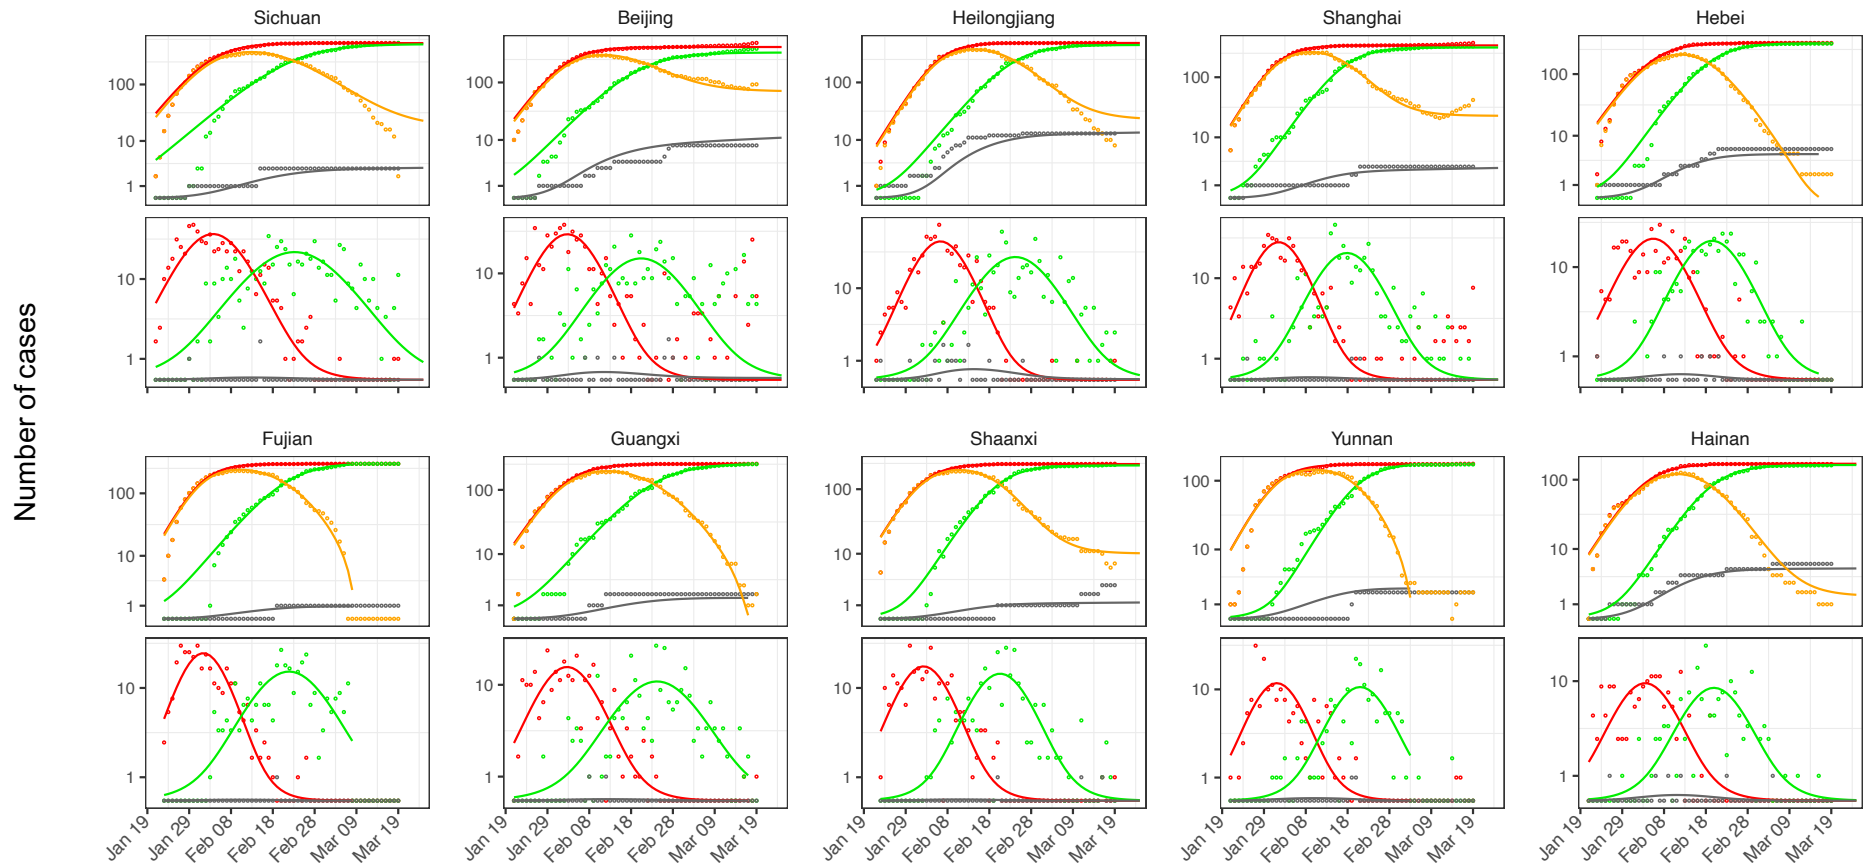

Fig. A2. Epidemics of SARS-CoV2 in 20 Chinese provinces with a minimum of 150 cases for normal- (a) and log-scale (b) y-axis. Dots are observed cases and lines are model fits. Red, green and grey colors indicate confirmed, recovered and deceased cases. For the normal scale (a), the left y-axis is for infected, recovered and sick cases and the right y-axis for deceased cases. Orange color indicates the number of “active” sick cases (relative to total infected, top panel), i.e. infected and not yet recovered or deceased, and the daily changes (bottom panel), with negative values (in normal scale) in the lower panel indicating that the number of active cases is decreasing. The upper panel for each province refers to the total number of cases while the lower panel refers to the daily change in the number of cases.
